## REVIEW

# Ontogeny of O<sub>2</sub> and CO<sub>2</sub>/H<sup>+</sup> chemosensitivity in adrenal chromaffin cells: role of innervation

 Shaima Salman<sup>1</sup>, Josef Buttigieg<sup>2</sup> and Colin A. Nurse<sup>1,\*</sup>
**ABSTRACT**

The adrenal medulla plays a key role in the physiological responses of developing and mature mammals by releasing catecholamines (CAT) during stress. In rodents and humans, the innervation of CAT-producing, adrenomedullary chromaffin cells (AMCs) is immature or absent during early postnatal life, when these cells possess 'direct' hypoxia- and CO<sub>2</sub>/H<sup>+</sup>-chemosensing mechanisms. During asphyxial stressors at birth, these mechanisms contribute to a CAT surge that is critical for adaptation to extra-uterine life. These direct chemosensing mechanisms regress postnatally, in parallel with maturation of splanchnic innervation. Here, we review the evidence that neurotransmitters released from the splanchnic nerve during innervation activate signaling cascades that ultimately cause regression of direct AMC chemosensitivity to hypoxia and hypercapnia. In particular, we consider the roles of cholinergic and opioid receptor signaling, given that splanchnic nerves release acetylcholine and opiate peptides onto their respective postsynaptic nicotinic and opioid receptors on AMCs. Recent *in vivo* and *in vitro* studies in the rat suggest that interactions involving α7 nicotinic acetylcholine receptors (nAChRs), the hypoxia inducible factor (HIF)-2α signaling pathway, protein kinases and ATP-sensitive K<sup>+</sup> (K<sub>ATP</sub>) channels contribute to the selective suppression of hypoxic chemosensitivity. In contrast, interactions involving μ- and/or δ-opioid receptor signaling pathways contribute to the suppression of both hypoxic and hypercapnic chemosensitivity, via regulation of the expression of K<sub>ATP</sub> channels and carbonic anhydrase (CA I and II), respectively. These data suggest that the ontogeny of O<sub>2</sub> and CO<sub>2</sub>/H<sup>+</sup> chemosensitivity in chromaffin cells can be regulated by the tonic release of presynaptic neurotransmitters.

**KEY WORDS:** Adrenal chromaffin cells, Neonate, Hypoxia, Hypercapnia, Catecholamine secretion, Nicotine, Opioids, HIF-2α, K<sub>ATP</sub> channels

**Introduction**

The structure of the mammalian adrenal gland was established by the middle of the 19th century with the aid of histochemical techniques that allowed visualization of the outer cortex as a distinct region from the inner medulla (Kölliker, 1854). In 1968, the term 'stimulus–secretion coupling' was coined following the discovery that calcium ions were required for catecholamine (CAT) secretion from 'chromaffin' cells in the adrenal medulla (Douglas, 1968). It is now generally recognized that in both mammalian and non-mammalian vertebrates (Perry and Capaldo, 2011), CAT release from chromaffin tissue plays a key role in the ability of the animal to adapt to environmental stressors. In the adult, activation of the sympathetic nervous system during stress initiates the 'fight or

flight' response, resulting in a coordinated series of autonomic responses that include an increase in blood pressure, heart rate and cardiac contractility. In mammals, CAT release from adrenomedullary chromaffin cells (AMCs), triggered by the stimulation of preganglionic splanchnic nerves, contributes to these cardiovascular responses mainly via the release of acetylcholine (ACh) and activation of postsynaptic nicotinic ACh receptors (nAChRs). In several species including rodents and humans, splanchnic innervation of the adrenal medulla is immature or absent at birth (Seidler and Slotkin, 1985; Slotkin and Seidler, 1988). Yet, it has been known for some time that CAT release from AMCs in the neonate plays a critical role in the ability of these animals to survive stressors associated with delivery and the transition to extra-uterine life (Cheung, 1990; Lagercrantz and Slotkin, 1986). This release is vital for the modulation of cardiovascular, respiratory and metabolic responses to natural asphyxial stressors present during the birthing process, e.g. low O<sub>2</sub> (hypoxia) and high CO<sub>2</sub>/H<sup>+</sup> (acid hypercapnia). Among these responses are the regulation of cardiac function via stimulation of α-adrenergic receptors (prior to the subsequent switch over to the adult β-adrenergic receptors), and initiation of lung respiration (Slotkin and Seidler, 1988). The latter involves the stimulation of surfactant secretion via β<sub>2</sub>-receptors, and transformation of the physiological properties of the lung epithelium from a state where fluid is secreted to one where fluid is reabsorbed (Olver et al., 1986; Van Woudenberg et al., 2012). In the developing rat embryo, the release of CAT during hypoxic stress has been proposed to promote fetal survival by reversing hypoxia-induced bradycardia, thereby maintaining O<sub>2</sub> homeostasis (Ream et al., 2008). Also, in fetal sheep, CAT release during hypoxia maintains peripheral vasoconstriction and aids in the redistribution of cardiac output away from non-essential organs (e.g. gut, kidneys) and towards essential organs such as the heart, brain and adrenal glands (Giussani et al., 1993).

Seidler and Slotkin showed that in the newborn rat, acute hypoxia causes depletion of adrenal catecholamines via a 'non-neurogenic' mechanism, which is lost or suppressed postnatally along a time course that roughly parallels the maturation of the sympathetic innervation of the adrenal medulla (Seidler and Slotkin, 1985). Furthermore, they showed in denervation experiments that removal of the splanchnic innervation in mature or adult animals resulted in a gradual re-appearance of this non-neurogenic mechanism (Slotkin and Seidler, 1988). More recent studies in the rat suggest that adrenal responses to hypercapnia, acidity and hypoglycemia are also suppressed postnatally, in parallel with splanchnic innervation (Livermore et al., 2011; Livermore et al., 2012; Muñoz-Cabello et al., 2005; Rico et al., 2005). Interestingly, in mammals that are born relatively mature (e.g. sheep), the development of adrenal gland innervation occurs *in utero* (Comline and Silver, 1961). Chromaffin cells in these mammals are responsive to direct asphyxial stimuli *in utero* before the full maturation of splanchnic innervation. However, chemosensitivity of these cells is lost postnatally within 24 h of birth,

<sup>1</sup>Department of Biology, McMaster University, Hamilton, ON, Canada, L8S 4K1.

<sup>2</sup>Department of Biology, University of Regina, Regina, SK, Canada, S4S 0A2.

\*Author for correspondence (nursec@mcmill.cis.mcmaster.ca)

**List of abbreviations**

|                  |                                                       |
|------------------|-------------------------------------------------------|
| ACh              | acetylcholine                                         |
| AMC              | adrenomedullary chromaffin cell                       |
| CaM              | Ca <sup>2+</sup> /calmodulin-dependent protein kinase |
| CAT              | catecholamine                                         |
| ETC              | electron transport chain                              |
| HIF              | hypoxia inducible factor                              |
| K <sub>ATP</sub> | ATP-sensitive K <sup>+</sup> channel                  |
| nAChR            | nicotinic acetylcholine receptor                      |
| PKA              | protein kinase A                                      |
| PKC              | protein kinase C                                      |
| ROS              | reactive oxygen species                               |

and this parallels the complete development of splanchnic innervation (Comline and Silver, 1961; Comline and Silver, 1966).

The mechanisms by which splanchnic innervation regulates O<sub>2</sub> and CO<sub>2</sub>/H<sup>+</sup> sensitivity of developing AMCs have remained elusive for many years. In this review, we consider recent evidence that begins to shine new light on the underlying mechanisms, particularly with regard to O<sub>2</sub> and CO<sub>2</sub> chemosensitivity. We will first review briefly current views on the signaling mechanisms by which perinatal AMCs are thought to sense acute hypoxia and hypercapnia. We will then consider evidence that supports the hypothesis that neurochemicals released tonically from the splanchnic nerve during innervation activate signaling cascades that result in the blunting of chemosensitivity. In addition to ACh, splanchnic nerve terminals release several neurochemicals including pituitary adenylate cyclase activating polypeptide, histamine and opiate peptides (Holger et al., 1998; Kobayashi et al., 1985; Kuri et al., 2009). Our main focus will be on the potential involvement of

nicotinic cholinergic and opioid receptor signaling pathways. A central theme that will emerge is that upregulation of ATP-sensitive K<sup>+</sup> (K<sub>ATP</sub>) channels via both nAChR signaling and opioid receptor signaling pathways is a key mechanism that contributes to the blunting of hypoxia chemosensitivity in AMCs. Conversely, the available evidence suggests that activation of opioid (but not ACh) receptor signaling pathways, culminating in the downregulation of carbonic anhydrase (CA)I and II, is a major contributor to the blunting of CO<sub>2</sub> chemosensitivity.

**Mechanisms of acute hypoxia sensing in perinatal AMCs**

The mechanisms by which perinatal AMCs sense acute hypoxia were first investigated using dissociated cells from the rat adrenal gland (Mochizuki-Oda et al., 1997; Mojet et al., 1997; Thompson et al., 1997). In response to acute hypoxia, isolated neonatal rat AMCs show inhibition of outward K<sup>+</sup> current and membrane depolarization, leading to voltage-gated Ca<sup>2+</sup> entry and CAT secretion (Mochizuki-Oda et al., 1997; Thompson et al., 1997). Exemplar traces of hypoxia-induced K<sup>+</sup> current inhibition and membrane depolarization in neonatal rat AMCs are shown in Fig. 1Ai,Bi and Fig. 2Ai,Bi. Acute hypoxia also induces CAT secretion when applied to fresh tissue slices of the adrenal gland (García-Fernández et al., 2007), and to superfused whole adrenal glands (Adams et al., 1996; Rico et al., 2005), from neonatal rat pups. Various K<sup>+</sup> channels modulate the excitability of perinatal rat and ovine AMCs and contribute to their physiological responses to hypoxia. Action potential duration and firing frequency are shaped by iberiotoxin-sensitive, large conductance Ca<sup>2+</sup>-dependent (BK) and delayed rectifier-type (K<sub>v</sub>) K<sup>+</sup> channels, both of which are inhibited by hypoxia (Mochizuki-Oda et al., 1997; Thompson et al.,

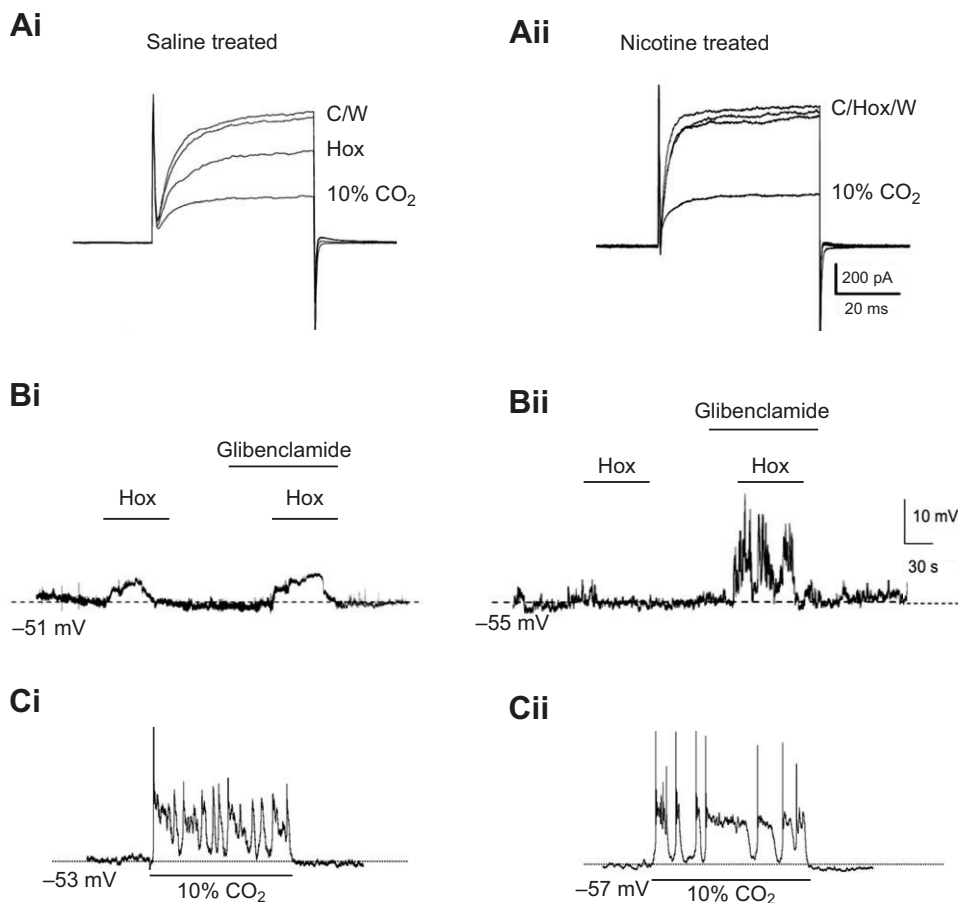

**Fig. 1. Effects of hypoxia and hypercapnia on outward K<sup>+</sup> current and membrane potential in saline- versus nicotine-treated postnatal day 0 (P0) adrenomedullary chromaffin cells (AMCs).** (Ai) In saline-treated AMCs, both hypoxia (Hox) and isohydric hypercapnia (10% CO<sub>2</sub>, pH 7.4) cause a reversible inhibition of outward K<sup>+</sup> current during steps to +30 mV. (Aii) In nicotine-treated AMCs, hypoxia does not affect outward K<sup>+</sup> current, although hypercapnia still produces significant inhibition at +30 mV. In current-clamp recordings, both hypoxia (Bi) and isohydric hypercapnia (10% CO<sub>2</sub>, pH 7.4; Ci) produce depolarizing excitatory responses in saline-treated AMCs. In nicotine-treated AMCs, only hypercapnia (Cii) causes excitation; hypoxia (Bii) fails to affect membrane potential. However, the hypoxic response in nicotine-treated AMCs can be rescued in the presence of glibenclamide (Bii), a K<sup>+</sup>-sensitive (K<sub>ATP</sub>) channel blocker. Note that glibenclamide on its own has no effect but it potentiates the hypoxia-induced membrane depolarization in saline-treated AMCs (Bi). C, control; W, wash (modified from Buttigieg et al., 2009).

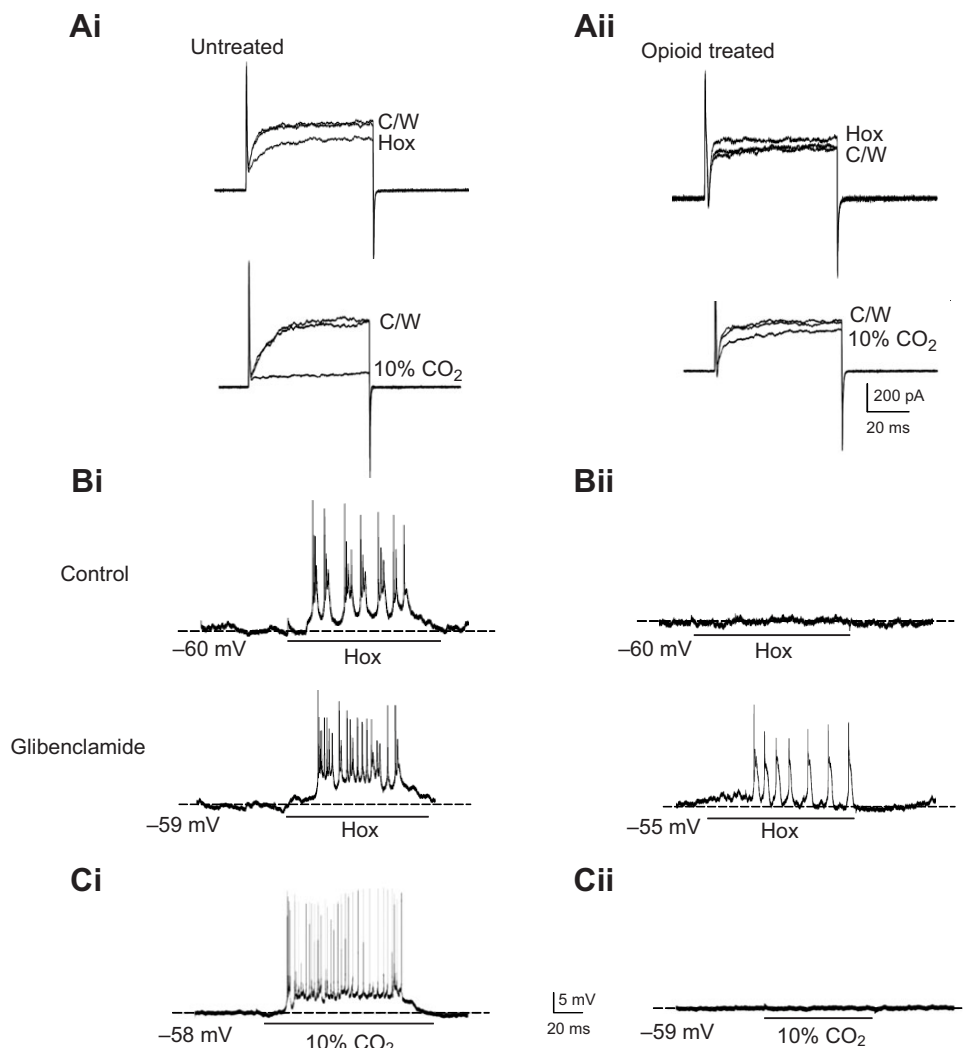

**Fig. 2. Effects of chronic opioid exposure on hypoxia and hypercapnia chemosensitivity in neonatal rat AMCs.** (Ai) In control (untreated) AMCs, both hypoxia (Hox; upper trace) and isohydric hypercapnia (10% CO<sub>2</sub>, pH 7.4; lower trace) cause a reversible inhibition of outward K<sup>+</sup> current during steps to +30 mV. (Aii) In opioid-treated AMCs, both hypoxia (upper trace) and hypercapnia (lower trace) have little or no effect on the outward K<sup>+</sup> current at +30 mV. In current-clamp recordings, both hypoxia (Bi, upper trace) and hypercapnia (Ci) produce depolarizing excitatory responses in control (untreated) AMCs. In contrast, both hypoxia (Bii, upper trace) and hypercapnia (Cii) fail to affect membrane potential significantly in opioid-treated AMCs. However, the cell (Bii, upper trace) that was initially unresponsive to hypoxia fires action potentials in the presence of glibenclamide (Bii, lower trace), a K<sub>ATP</sub> channel blocker. Note that glibenclamide potentiates the hypoxia-induced membrane depolarization in untreated AMCs (Bi, lower trace). C, control; W, wash (modified from Salman et al., 2013).

2002; Thompson et al., 1997; Thompson and Nurse, 1998). In addition, hypoxia inhibits apamin-sensitive, small conductance Ca<sup>2+</sup>-dependent (SK) K<sup>+</sup> channels and this mechanism principally contributes to the depolarization (or receptor potential) of rat and ovine AMCs at the resting membrane potential (Keating et al., 2005; Keating et al., 2001; Lee et al., 2000). However, acute hypoxia is associated with a fall in intracellular ATP concentration (Varas et al., 2007) leading to the activation of glibenclamide-sensitive K<sub>ATP</sub> channels, and membrane hyperpolarization in neonatal rat AMCs (Thompson and Nurse, 1998). This is thought to serve as a protective mechanism that limits membrane depolarization and Ca<sup>2+</sup>-dependent CAT secretion during hypoxia. In rat embryos, expression of hypoxia-sensitive BK and K<sub>ATP</sub> channels appears to be oppositely regulated during mid-to-late fetal stages (Bournaud et al., 2007). Though inhibition of K<sup>+</sup> channels is the main contributor to hypoxia-induced membrane depolarization and Ca<sup>2+</sup>-dependent CAT secretion in rat, mouse and ovine AMCs, species differences have been noted. For example, in guinea pig AMCs, hypoxia appears to activate a non-selective cationic current, leading to membrane depolarization (Inoue et al., 1999).

Additionally, there is evidence that alterations in the expression pattern of specific Ca<sup>2+</sup> channel subtypes may also contribute to the ontogeny of rat AMC responsiveness to hypoxia. In particular, low voltage-activated T-type Ca<sup>2+</sup> channels (Ca<sub>v</sub>3.2 subtype) were

reported to be necessary for hypoxia-evoked CAT secretion in tissue slices of neonatal rat adrenal medulla (Levitsky and López-Barneo, 2009). In that study, T-type Ca<sup>2+</sup> channel expression decreased with postnatal maturation, together with the loss of hypoxia sensitivity. Moreover, denervation of adult AMCs resulted in the reappearance of hypoxia sensitivity in parallel with T-type Ca<sup>2+</sup> channel recruitment (Levitsky and López-Barneo, 2009). While these studies suggest that hypoxia-evoked CAT secretion in tissue slices may involve additional factors such as activation of T-type Ca<sup>2+</sup> channels, the significance is uncertain, as in another study pharmacological blockade of these channels had no effect on hypoxia-evoked CAT secretion in isolated neonatal rat AMCs (Souvannakitti et al., 2010).

Though several of the downstream events during hypoxia chemotransduction in neonatal AMCs have been well characterized, the molecular identity of the 'O<sub>2</sub> sensor' is still unknown. The available evidence favors the mitochondrial electron transport chain (ETC), in association with a change in redox status, as playing an important role in hypoxia sensing in both rodent and ovine AMCs (Keating et al., 2005; Nurse et al., 2009). For example, various blockers of the ETC including the complex I blocker, rotenone, mimicked and occluded the effects of acute hypoxia (Keating et al., 2005; Mojet et al., 1997; Thompson et al., 2007). Further, hypoxia sensing is present in an immortalized chromaffin cell line (i.e. MAH cells) derived from fetal rat adrenal medulla (Fearon et al., 2002),

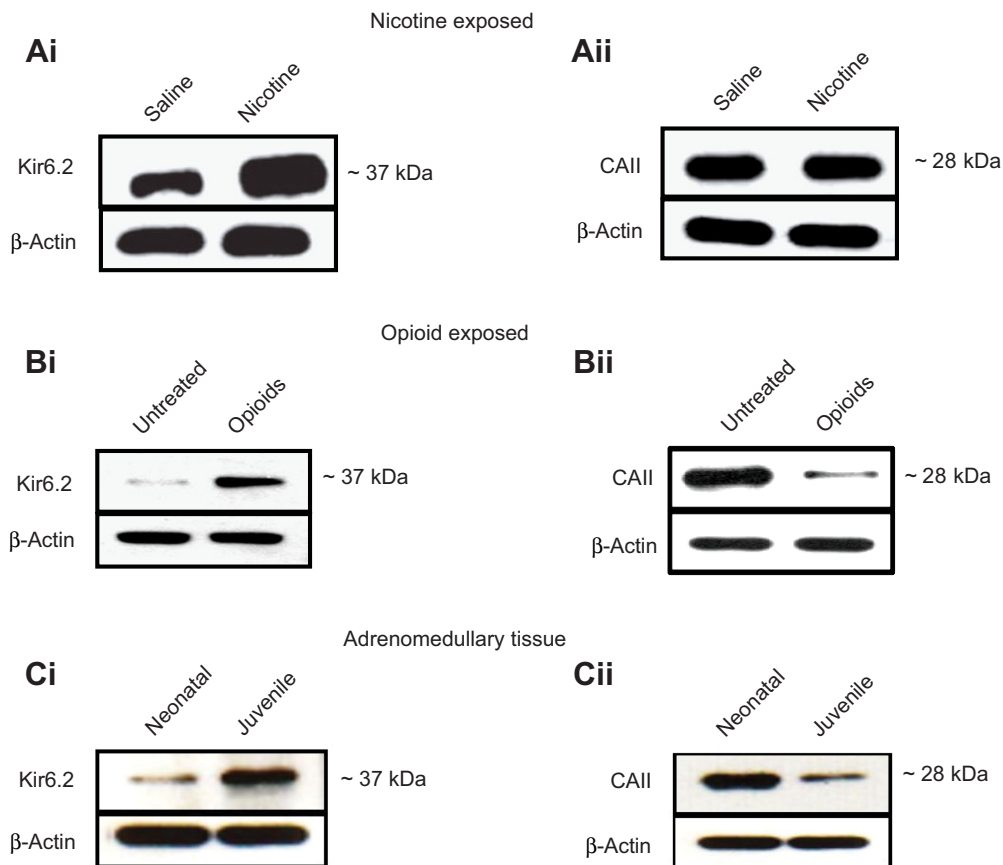

**Fig. 3. K<sub>ATP</sub> channel subunit Kir6.2 and carbonic anhydrase II (CAII) expression in nicotine- and opioid-exposed neonatal rat AMCs and rat adrenomedullary tissues.** (Ai) Western blot analysis showing a significant upregulation of K<sub>ATP</sub> channel subunit Kir6.2 in P0 AMCs from nicotine-exposed pups relative to saline-exposed pups. (Aii) Western blot analysis shows similar expression levels of CAII protein in saline- and nicotine-exposed AMCs (Buttigieg et al., 2009). (Bi) Similarly, chronic opioid exposure causes upregulation of Kir6.2 subunit expression in cultured neonatal AMCs (Salman et al., 2013). (Bii) In addition, chronic opioid exposure downregulates CAII protein expression in cultured neonatal AMCs; β-actin was used as an internal control (Salman et al., 2013). Interestingly, Kir6.2 subunit and CAII expression appear to be developmentally regulated in neonatal versus juvenile adrenomedullary enriched tissue. Western blot analysis reveals developmental upregulation in Kir6.2 subunit (Ci) and downregulation in CAII (Cii) expression in juvenile adrenomedullary tissue.

but is absent in mitochondria-deficient (p0) MAH cells (Buttigieg et al., 2008b). The involvement of redox pathways was suggested by the observations that reducing agents (e.g. dithiothreitol) or scavengers of reactive oxygen species (ROS; including catalase) mimicked hypoxia in inhibiting O<sub>2</sub>-sensitive K<sup>+</sup> currents, whereas increasing ROS had the opposite effect (Keating et al., 2005; Thompson et al., 2007). A current working model based on these studies proposes that a decrease in H<sub>2</sub>O<sub>2</sub> during acute hypoxia may modulate the gating of oxygen-sensitive K<sup>+</sup> channels (e.g. SK channels) in AMCs, leading to a decrease in their open probability. The resulting inhibition of these K<sup>+</sup> channels causes membrane depolarization, voltage-gated Ca<sup>2+</sup> entry and CAT release.

#### Mechanisms of acute CO<sub>2</sub>/H<sup>+</sup> sensing in perinatal AMCs

Compared with hypoxia sensing, there have been relatively few studies on the mechanisms and ontogeny of CO<sub>2</sub>/H<sup>+</sup> sensing in AMCs. The initial study demonstrating that neonatal rat AMCs can respond directly to elevated CO<sub>2</sub> (hypercapnia) in a dose-dependent manner was performed on thin adrenal slices (Muñoz-Cabello et al., 2005). Using carbon fiber amperometry, these authors found that CAT secretory responses of AMCs to hypercapnia were significantly higher in neonatal compared with adult slices. These secretory responses were correlated with a fall in intracellular pH, required extracellular Ca<sup>2+</sup> and were inhibited by the membrane-permeable CA inhibitor methazolamide (2 μmol l<sup>-1</sup>) (Muñoz-Cabello et al., 2005). Electrophysiological studies on dissociated neonatal rat AMCs demonstrated that hypercapnia induces a depolarizing receptor potential, often leading to action potential firing, and also inhibits a voltage-dependent outward K<sup>+</sup> current (Buttigieg et al., 2008b; Livermore et al., 2011; Muñoz-Cabello et al., 2005). Exemplar traces of hypercapnia (10% CO<sub>2</sub>)-induced K<sup>+</sup> current

inhibition and membrane depolarization in neonatal rat AMCs are shown in Fig. 1Ai,Ci and Fig. 2Ai,Ci. The depolarizing receptor potential was also inhibited by methazolamide and was attributable to the activation of a resting cation conductance (Muñoz-Cabello et al., 2005). Studies on tissue slices using *in situ* hybridization revealed that only two CA isoforms, i.e. CAI and CAII, were expressed in chromaffin tissue of the neonatal rat adrenal gland; interestingly, their expression was significantly diminished or absent in the adult gland, in parallel with the diminished hypercapnia sensitivity (Muñoz-Cabello et al., 2005). As illustrated in Fig. 3Cii, western blot analysis has also revealed decreased expression of CAII protein in adrenomedullary tissue from juvenile compared with neonatal rats. Taken together, these data show that acute CO<sub>2</sub> sensing in neonatal AMCs involves intracellular acidification catalyzed by CAI and CAII, leading to membrane depolarization and action potential firing, voltage-gated Ca<sup>2+</sup> entry, and CAT secretion. Also, the developmental loss of hypercapnia sensitivity was attributable to the downregulation of CAI and CAII as the primary events.

#### Role of nAChR signaling in regulating the ontogeny of hypoxia, but not hypercapnia, sensitivity in chromaffin cells

The ontogeny of hypoxia and hypercapnia sensitivity in rat AMCs, and particularly the blunting that occurs during early postnatal development, is tightly correlated with maturation of splanchnic innervation as discussed in the Introduction. Given that cholinergic innervation via the splanchnic nerve provides the major excitatory drive to AMCs, it was plausible that activation of postsynaptic nAChRs contributed to this blunting. In one attempt to test this hypothesis, AMCs were isolated from neonatal (P0) pups born to dams that were exposed to nicotine bitartrate (versus saline-treated

controls) throughout gestation, before they were tested for hypoxia and hypercapnia sensitivity (Buttigieg et al., 2008a). Because nAChRs are already expressed on the 'non-innervated' fetal AMCs (Sala et al., 2008), the aim was to stimulate prematurely these nicotinic receptors via the maternal circulation, and test whether or not there was a precocious blunting of hypoxia and hypercapnia sensitivity. Indeed, compared with age-matched saline controls, nicotine-treated P0 AMCs showed a blunted hypoxia sensitivity as revealed by: (i) the failure of acute hypoxia to inhibit voltage-gated outward  $K^+$  current or to elicit a depolarizing receptor potential (as shown in Fig. 1Ai,ii and 1Bi,ii, respectively); (ii) the failure of acute hypoxia to elicit a significant rise in intracellular  $Ca^{2+}$ ; and (iii) the failure of acute hypoxia to stimulate CAT secretion (Buttigieg et al., 2008a). Interestingly, fetal nicotine exposure had no effect on the ability of these P0 AMCs to respond appropriately to isohydric hypercapnia (10%  $CO_2$ , pH 7.4). Thus, nicotine-exposed P0 AMCs responded to isohydric hypercapnia with inhibition of voltage-gated outward  $K^+$  current, membrane depolarization (as shown in Fig. 1Ci,ii), a rise in intracellular  $Ca^{2+}$ , and CAT secretion (Buttigieg et al., 2008a). Moreover, expression of the two main enzymes that mediate  $CO_2$  sensitivity, i.e. CAI and CAII (Muñoz-Cabello et al., 2005), was similar in saline- and nicotine-exposed P0 AMCs when analyzed at both protein and mRNA levels (Buttigieg et al., 2008a). Though effective in blunting hypoxia sensitivity, the failure of prenatal nAChR stimulation to mimic the effects of innervation in blunting hypercapnia sensitivity suggested the involvement of other neural factors (see later).

The effects of nicotine exposure on the blunting of hypoxia sensitivity were mediated via nAChR signaling pathways. This conclusion was derived from experiments on culture models where neonatal rat AMCs and immortalized chromaffin (MAH) cells were chronically exposed to nicotine base ( $50 \mu\text{mol l}^{-1}$ ) with or without nicotinic blockers for up to ~1 week *in vitro* (Buttigieg et al., 2009). Consistent with the results from *in vivo* nicotine exposures, hypoxia sensitivity was blunted when chromaffin cells were cultured for ~1 week in the presence of nicotine, but was retained when nicotine was omitted from the medium. These effects of nicotine could be prevented by co-incubation with the  $\alpha 7$  nAChR antagonist  $\alpha$ -bungarotoxin but not with a non- $\alpha 7$  antagonist (e.g. hexamethonium), suggesting that signaling via  $\alpha 7$  nAChR was involved (Buttigieg et al., 2009). Despite these findings, the fate of  $\alpha 7$  and other nAChRs expressed on chromaffin cells during chronic nicotine exposure is still unknown. This knowledge is important for a full understanding of the signaling pathways, given the well-known desensitization properties of these nAChRs following prolonged agonist exposure (Papke et al., 2009). In this regard, when chronic nicotine was applied to neuroblastoma cells expressing  $\alpha 7$ - and  $\alpha 3$ -containing receptors, there appeared to be a time-dependent loss of  $\alpha 7$  nAChR function after ~4 days exposure, as monitored by intracellular  $Ca^{2+}$  imaging (Ridley et al., 2002).

#### **Role of opioid receptor signaling in regulating the ontogeny of hypoxia and hypercapnia sensitivity in chromaffin cells**

The failure of chronic nicotine to blunt hypercapnia sensitivity in neonatal AMCs (as discussed above) suggested other neural factors may be involved. In addition to ACh, splanchnic nerve terminals also store and release opiate peptides (Holgert et al., 1998; Kobayashi et al., 1985), and the three major subclasses of opioid receptors, i.e.  $\mu$ ,  $\delta$  and  $\kappa$ , are known to be present in the adrenal medulla (Bunn et al., 1988; Keating et al., 2004; Kimura et al., 1988; Wittert et al., 1996). Also, opiate peptides are co-released with catecholamines from AMCs (Livett et al., 1981). These

considerations led to an investigation of whether chronic opioids *in vitro* contribute to the blunting of AMC sensitivity to isohydric hypercapnia (Salman et al., 2013). Interestingly, exposure of primary neonatal rat AMC cultures for ~1 week to  $\mu$ - or  $\delta$ -opioid receptor agonists ( $2 \mu\text{mol l}^{-1}$ ), separately or together, led to the blunting of both hypoxia and hypercapnia sensitivity as shown in Fig. 2Ai,ii, 2Bi,ii (upper traces) and 2Ci,ii. In contrast, exposure to a  $\kappa$ -opioid receptor agonist over the same time period was ineffective (Salman et al., 2013). The blunting effects of combined  $\mu$ - and  $\delta$ -opioid agonists on both chemostimuli were prevented when the agonists were co-incubated with a general opioid antagonist, naloxone ( $2 \mu\text{mol l}^{-1}$ ), over the duration of the culture period. Western blot analysis revealed that the blunting of  $CO_2$  sensitivity in opioid-treated AMCs was correlated with the downregulation of carbonic anhydrases, CAI and CAII (Salman et al., 2013). As discussed below, the blunting of hypoxia sensitivity was attributable to the upregulation of  $K_{ATP}$  channels, and this was the case for both chronic opioid and chronic nicotine exposures. It should be noted, however, that acute exposure of ovine AMCs to  $\mu$ - and  $\kappa$ -opioid agonists can lead to a suppression of hypoxia sensitivity (Keating et al., 2004). These authors reported that in the case of  $\mu$ -agonists, the suppression was mediated via activation of a resting  $O_2$ -sensitive,  $Ca^{2+}$ -dependent  $K^+$  (SK) conductance, as well as inhibition of voltage-dependent  $Ca^{2+}$  channels. These mechanisms appear quite different from those involved in the effects of chronic opioids on the hypoxia sensitivity of neonatal rat AMCs, as the latter involves changes in gene expression and occurs independently of  $\kappa$ -opioid receptors (Salman et al., 2013).

#### **Upregulation of $K_{ATP}$ channel expression contributes to the blunting of hypoxia sensitivity in nicotine- and opioid-treated cells**

The blunting of hypoxia sensitivity that occurs during chronic exposure of neonatal AMCs to either nicotine or opioids could occur at several levels and by a variety of mechanisms. These include: (i) downregulation of the  $O_2$  sensor or a defective one; and (ii) alterations in the signaling cascade, including changes in expression levels of the  $O_2$ -sensitive  $K^+$  channels, or T-type  $Ca^{2+}$  channels. As discussed earlier in this review, inhibition of SK, BK and  $K_v$  channels in neonatal AMCs contributes to the depolarization necessary for voltage-gated  $Ca^{2+}$  entry and CAT secretion during acute hypoxia. However, the magnitude of this depolarization is blunted by the hyperpolarizing action caused by the simultaneous opening of  $K_{ATP}$  channels, associated with the fall in ATP during hypoxia. Thus, the activation of  $K_{ATP}$  channels can be seen as a 'brake' on AMC secretion under these conditions. Consequently, an increase in the strength of this breaking action alone could, in principle, act as a potential mechanism for blunting hypoxia sensitivity. The available evidence suggests this is indeed the main mechanism by which chronic nicotine and chronic opioids mediate their effects on hypoxia sensing in neonatal AMCs (Buttigieg et al., 2009; Salman et al., 2013). For example, the magnitude of the  $K_{ATP}$  current density estimated from voltage-clamp studies using the  $K_{ATP}$  channel blocker glibenclamide was significantly enhanced in both nicotine-treated (Buttigieg et al., 2009) and opioid-treated (Salman et al., 2013) cells, relative to untreated controls. Also, as exemplified in Fig. 1Bii (nicotine treatment) and Fig. 2Bii (opioid treatment), individual cells that initially failed to respond to hypoxia with membrane depolarization did so when the experiment was repeated in the presence of glibenclamide. These data suggest that the  $O_2$  sensor per se remained relatively intact, and that the apparent loss of hypoxia sensitivity could be attributed to a greater

hyperpolarizing contribution from  $K_{ATP}$  channels at the resting potential. However, the potential involvement of T-type  $Ca^{2+}$  channels in the loss of hypoxia sensitivity (Levitsky and López-Barneo, 2009) is not excluded.

Molecular studies also support the upregulation of  $K_{ATP}$  channels in neonatal AMCs after chronic nicotine and chronic opioid exposures. The  $K_{ATP}$  channel is a tetrameric complex consisting of four pore-forming Kir6.x subunits in combination with four regulatory sulfonylurea receptor subunits (Nichols, 2006). As illustrated in Fig. 3Ai and 3Bi, western blot analysis revealed that when neonatal rat AMCs were chronically exposed to nicotine and opioids *in vitro* there was a significant upregulation of Kir6.2 subunit expression (Buttigieg et al., 2009; Salman et al., 2012; Salman et al., 2013). These data are consistent with the functional evidence for increased  $K_{ATP}$  channel activity during hypoxia after both chronic treatments. The upregulation of Kir6.2 protein in nicotine-exposed (compared with saline-exposed) adrenomedullary tissue was also demonstrated in experiments where adrenal glands were isolated from newborn rat pups born to dams that were exposed chronically to nicotine throughout gestation (Buttigieg et al., 2009). In fact, *in vivo* administration of the  $K_{ATP}$  channel blocker glibenclamide to these nicotine-exposed pups prevented the loss of hypoxia tolerance seen in littermates without glibenclamide pretreatment (Buttigieg et al., 2009). These data further emphasize the critical role played by  $K_{ATP}$  channels in the ontogeny of hypoxia sensitivity in AMCs.

#### Is $K_{ATP}$ channel expression correlated with the ontogeny of hypoxia sensitivity *in vivo*?

Given the proposed central role of  $K_{ATP}$  channels in regulating  $O_2$  sensitivity and hypoxia-evoked CAT secretion, the question arises whether the ontogeny of hypoxia sensitivity in AMCs is correlated with  $K_{ATP}$  channel expression during development. Studies on fetal rat AMCs suggest there are developmental changes in the magnitude of the  $K_{ATP}$  current relative to the other  $O_2$ -sensitive  $K^+$  currents, and these properties directly affect hypoxia-evoked CAT secretion during mid-to-late gestation (Bournaud et al., 2007). These authors reported that at fetal day (F)15 a higher level of  $K_{ATP}$  relative to other  $O_2$ -sensitive  $Ca^{2+}$ -dependent  $K^+$  [ $I_{K(Ca)}$ ] currents resulted in membrane hyperpolarization and blunted CAT secretion during acute hypoxia (Bournaud et al., 2007). Accordingly, at F15 the percentage of total outward current carried by glibenclamide-sensitive  $K_{ATP}$  channels  $I_{K(ATP)}$  was ~50% compared with ~30% for  $I_{K(Ca)}$  under normoxic conditions; however, at late fetal (F19) stages,  $I_{K(ATP)}$  was reduced to ~14% of the total current, compared with ~64% for  $I_{K(Ca)}$  (Bournaud et al., 2007). In that study, acute hypoxia caused an increase in action potential firing and robust CAT secretion only when applied to F19 AMCs. The failure of hypoxia to induce CAT secretion in F15 AMCs, as a result of the higher  $K_{ATP}$  channel expression, may be physiologically important in preventing premature lung fluid clearance via the action of circulating CAT on  $\beta$ -adrenergic receptors on pulmonary epithelial cells (Bournaud et al., 2007; Lagercrantz and Bistoletti, 1977; Olver et al., 1986).

As discussed in the Introduction, there is strong evidence that hypoxia sensitivity in AMCs declines postnatally as a consequence of splanchnic innervation *in vivo*. If the strategy discussed above of exposing perinatal AMCs to chronic nicotine or chronic opioids does indeed mimic the effects of splanchnic innervation, albeit prematurely, then this should be reflected in the expression pattern of  $K_{ATP}$  channels during normal development. As illustrated in Fig. 3Ci, western blot analysis revealed that the expression of the Kir6.2 subunit of the  $K_{ATP}$  channel (relative to  $\beta$ -actin) was

significantly upregulated in adrenomedullary tissue dissected from adrenals glands of juvenile rats when compared with neonatal rats. This raises the possibility that innervation of AMCs per se could lead to upregulation of  $K_{ATP}$  channel expression *in vivo*, in association with the loss of hypoxia sensitivity. The result is also consistent with the idea that ACh and opiate peptides released from the splanchnic nerve during postnatal development could mediate the upregulation of  $K_{ATP}$  channels, via interaction with postsynaptic nicotinic and opioid receptors, respectively.

#### Molecular mechanisms by which chronic nicotine upregulates $K_{ATP}$ channels: role of protein kinases and hypoxia inducible factor (HIF)-2 $\alpha$

As discussed above, interactions involving the  $\alpha 7$  nAChR appear necessary for the nicotine-induced blunting of hypoxia sensitivity in neonatal AMCs. What are the intervening steps between the  $\alpha 7$  nAChR interaction and the upregulation of  $K_{ATP}$  channels during chronic nicotine exposure? Though  $\alpha 7$  nAChRs are highly  $Ca^{2+}$  permeable, the role of intracellular  $Ca^{2+}$  signaling is complicated by the observation that simply exposing neonatal AMCs to a chronic depolarizing stimulus (high  $K^+$ , 30 mmol l<sup>-1</sup>), expected to stimulate voltage-gated  $Ca^{2+}$  entry, did not mimic the effects of chronic nicotine (Buttigieg et al., 2009). Nevertheless, experiments using protein kinase blockers revealed critical roles for protein kinase C (PKC) and  $Ca^{2+}$ /calmodulin-dependent (CaM) kinase, but not protein kinase A (PKA) (Buttigieg et al., 2009). These authors reported that when cultures of neonatal rat AMCs were co-incubated with nicotine plus either GF109203X (a PKC blocker) or KN-62 (a CaM kinase blocker) for ~1 week, hypoxia sensitivity was retained as measured by the inhibition of outward  $K^+$  current. However, co-incubation with H-89, a PKA blocker, had no effect on the blunting action of nicotine exposure on hypoxia sensitivity. Confirmation that the requirement for PKC and CaM kinase function occurred upstream of  $K_{ATP}$  channel upregulation was obtained from experiments on the immortalized chromaffin cell line, i.e. MAH cells (Buttigieg et al., 2009). In these experiments, the upregulation of the Kir6.2 subunit of the  $K_{ATP}$  channel seen in MAH cells exposed to chronic nicotine for ~1 week *in vitro* was prevented during co-incubation with GF109203X or KN-62, but not H-89.

The MAH cell model revealed an additional role of the transcription factor HIF-2 $\alpha$  in the nicotine-induced blunting of hypoxia sensitivity and the upregulation of the  $K_{ATP}$  channel subunit Kir6.2. Hypoxia-inducible factors are a family of transcription factors including HIF-1 $\alpha$  and HIF-2 $\alpha$ , which are key regulators of gene expression under hypoxic conditions (Semenza, 2004). The functional complex is a heterodimer consisting of an  $\alpha$ - and a  $\beta$ -subunit, and though both subunits are constitutively expressed, the  $\alpha$ -subunit is rapidly degraded under normoxic conditions (Huang et al., 1998; Wang et al., 1995). While hypoxia is a potent inducer of HIFs, several pathophysiological conditions such as inflammation and oxidative stress can lead to HIF accumulation (Taylor, 2008). The initial indication that the HIF pathway was involved in nicotine-induced blunting of hypoxia sensitivity came from experiments on a HIF-2 $\alpha$ -deficient (>90% knockdown) MAH cell line (shMAH) created using interference RNAi techniques (Brown et al., 2009). Both untransfected and transfected scrambled control MAH (scMAH) cells showed typical responses to hypoxia as measured by the inhibition of outward  $K^+$  current (Buttigieg et al., 2009). Moreover, similar to primary neonatal AMCs, both of these cell lines showed a blunted hypoxia sensitivity following ~1 week exposure to chronic nicotine *in vitro*. However, when HIF-2 $\alpha$ -deficient MAH cells were exposed to

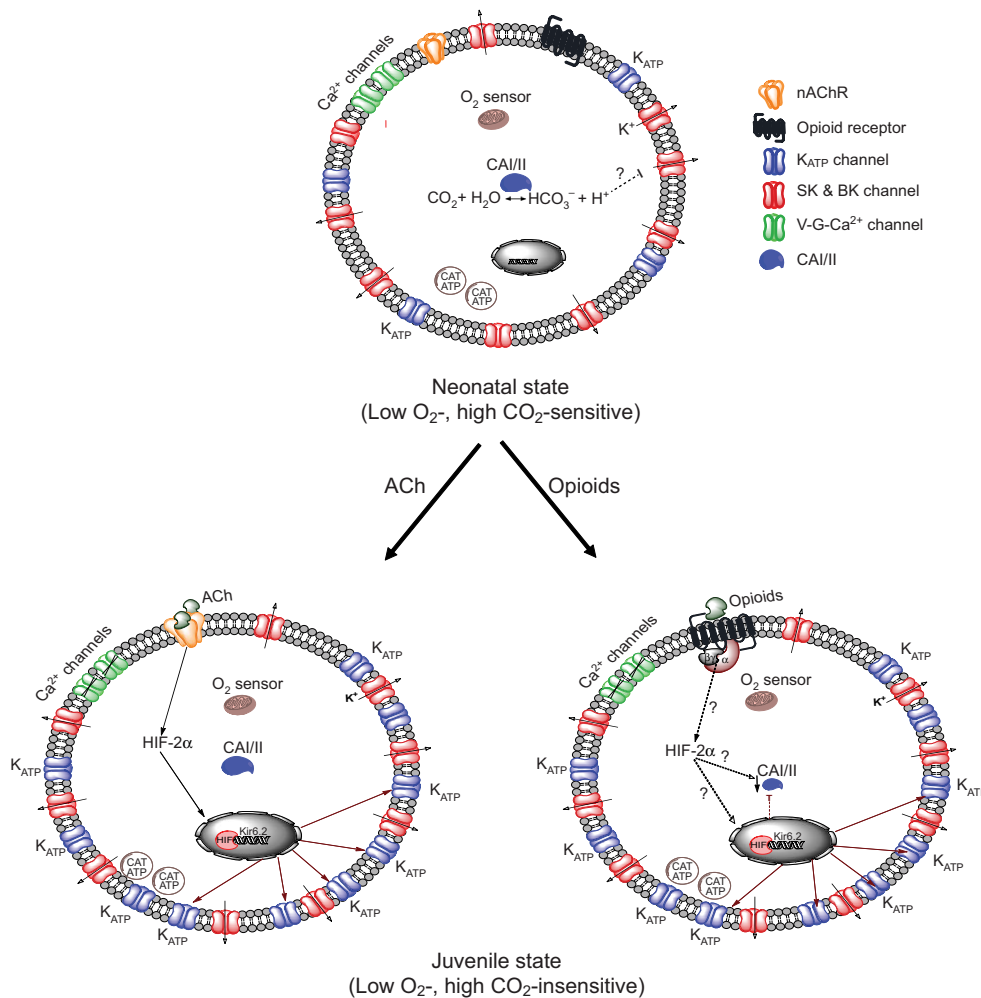

**Fig. 4. Schematic representation showing the effects of stimulating nicotinic acetylcholine receptors (nAChRs) and opioid receptors on specific targets in the chemotransduction cascade in rat chromaffin cells.** Chronic stimulation of the nAChRs and opioid receptors induces a signaling pathway that leads to functional hypoxia inducible factor (HIF)-dependent upregulation of the K<sub>ATP</sub> channel. Activation of the K<sub>ATP</sub> channel during hypoxia reduces membrane depolarization necessary for voltage-dependent Ca<sup>2+</sup> entry and catecholamine (CAT) release. Unlike nAChRs, chronic stimulation of opioid receptors further downregulates CAI/II, thereby blunting hypercapnia chemosensitivity in these cells.

chronic nicotine for the same duration, hypoxia sensitivity was retained, suggesting a role for HIF-2 $\alpha$ . More recent studies have clarified the role of HIF-2 $\alpha$ , and particularly its involvement in the regulation of the Kir6.2 subunit in chromaffin cells. Unlike the rapid induction of HIF-2 $\alpha$  that occurs when control MAH cells are exposed the chronic hypoxia (2% O<sub>2</sub>) *in vitro* (Brown and Nurse, 2008), chronic nicotine exposure causes a gradual accumulation of HIF-2 $\alpha$ . During nicotine exposure, a significant increase in HIF-2 $\alpha$  levels in MAH cells was not detectable after 24 h, but reached near-maximum levels by 3 days and remained elevated at 7 days of exposure (Salman et al., 2012). Interestingly, western blot analyses revealed that the time course of HIF-2 $\alpha$  accumulation paralleled that of the increased expression of the Kir6.2 subunit. This effect was not limited to Kir6.2, as another ubiquitous HIF target, i.e. vascular endothelial growth factor or VEGF, was also upregulated by chronic nicotine exposure (Salman et al., 2012). These effects of chronic nicotine on HIF-2 $\alpha$  accumulation and Kir6.2 upregulation were prevented during co-incubation with the  $\alpha 7$  nAChR blocker  $\alpha$ -bungarotoxin, and were absent in HIF-2 $\alpha$ -deficient MAH cells. Examination of the promoter region of the Kir6.2 gene revealed a hypoxia response element and, moreover, chromatin immunoprecipitation assays revealed binding of HIF-2 $\alpha$  to this promoter region in nicotine-treated MAH cells (Salman et al., 2012). Taken together, these data suggest the linking of  $\alpha 7$  nAChR signaling, activation of PKC and CaM kinase pathways and HIF-2 $\alpha$  accumulation to the transcriptional upregulation of the

K<sub>ATP</sub> channel subunit Kir6.2 during exposure of chromaffin cells to chronic nicotine. However, the link between the  $\alpha 7$  nAChR and HIF-2 $\alpha$  accumulation during chronic nicotine exposure remains unclear. There is evidence that the increase in intracellular Ca<sup>2+</sup> that occurs in PC12 cells exposed to chronic intermittent hypoxia leads to HIF-2 $\alpha$  degradation via activation of Ca<sup>2+</sup>-dependent proteases, i.e. calpains (Prabhakar et al., 2009). Given that chronic nicotine exposure may lead to a slow loss of  $\alpha 7$  nAChR function, and an associated reduction in Ca<sup>2+</sup> influx (Ridley et al., 2002), it is plausible that such a mechanism could contribute to the delayed HIF-2 $\alpha$  stabilization seen in nicotine-treated MAH cells (Salman et al., 2012). Though it still remains to be determined whether PKC and CaM kinase act upstream or downstream of HIF-2 $\alpha$  accumulation, the net result of these interactions is the blunting of hypoxia sensitivity because of the increased expression of functional K<sub>ATP</sub> channels.

#### Concluding remarks

In this review, we have considered the evidence that neurochemicals supplied by splanchnic innervation are involved in the ontogeny of hypoxia and CO<sub>2</sub>/H<sup>+</sup> chemosensitivity in mammalian AMCs. The search for such factors was triggered by the observations that CAT secretion from perinatal AMCs in response to these chemostimuli was highly correlated with the innervation status (Muñoz-Cabello et al., 2005; Nurse et al., 2009; Slotkin and Seidler, 1988). This CAT secretion is critical for the proper transition to extra-uterine life

(Lagercrantz and Slotkin, 1986). The weight of current evidence favors both cholinergic and opioid innervation of AMCs as key contributors to the suppression of chemosensitivity. In attempts to mimic the effects of cholinergic innervation, AMCs were chronically exposed to nicotine *in utero* or *in vitro*. This resulted in a blunting of hypoxia sensitivity, though high CO<sub>2</sub> (hypercapnia) sensitivity remained intact. Conversely, exposure of AMCs to chronic  $\mu$ - and  $\delta$ -opioid agonists *in vitro* resulted in the blunting of both hypoxia and hypercapnia sensitivity. It would appear that premature stimulation of nAChRs and opioid receptors on AMCs with these neurotransmitter mimetics, at earlier times than they would experience during splanchnic innervation, essentially hijacks the signaling mechanisms that mediate the normal developmental loss of chemosensitivity. A central theme that has emerged is that for both chronic nicotine and opioid exposures, the upregulation of K<sub>ATP</sub> channels is a key mechanism that contributes to the blunting of hypoxia sensitivity, by favoring membrane hyperpolarization during acute hypoxia. The slow accumulation of the transcription factor HIF-2 $\alpha$ , at least during chronic nicotine exposure, leads to the transcriptional upregulation of the K<sub>ATP</sub> channel subunit Kir6.2. The effect of nicotine exposure on expression of the K<sub>ATP</sub> channel subunit Kir6.2 is also dependent on the activity of PKC and CaM kinase. These kinases have previously been implicated in pathways leading to the synthesis and stabilization of HIF-1 $\alpha$  protein, and in the transcriptional activity of HIF-1 in cells exposed to intermittent hypoxia (Semenza, 2009; Yuan et al., 2005; Yuan et al., 2008). However, it remains to be determined whether similar intervening pathways regulate HIF-2 in perinatal AMCs following nicotine exposure. Though further studies are required to clarify the opioid receptor signaling pathways, the opioid-mediated decrease in carbonic anhydrase (CAI and CAII) expression in AMCs seems to be the main contributor to the suppression of hypercapnia sensitivity. It is noteworthy, however, that chronic opioid exposure can lead to the accumulation of HIF-1 in neuroblastoma cells (Daijo et al., 2011). Thus, it is plausible that the HIF pathway may also be involved in the upregulation of K<sub>ATP</sub> channels, and downregulation of CA, in AMCs following opioid exposure. Working models that summarize our current understanding of the signaling pathways by which chronic nicotine and opioids regulate chemosensitivity in developing AMCs are summarized in Fig. 4.

While the studies summarized in this review suggest possible mechanisms by which innervation may contribute to the ontogeny of hypoxia and CO<sub>2</sub>/H<sup>+</sup> sensitivity in chromaffin cells, they also have clinical implications. Blunted adrenal CAT release during asphyxia contributes to the failure of arousal and elevated neonatal mortality as occurs during sudden infant death syndrome (SIDS) (Buttigieg et al., 2009; Cohen et al., 2005; Sawnani et al., 2004). Also, cigarette smoking during pregnancy has been linked to an increased risk of SIDS, likely due to the presence of nicotine (Mitchell and Milerad, 2006). Indeed, prenatal nicotine exposure is associated with an increased mortality rate when the affected offspring are exposed to a hypoxic challenge (Slotkin et al., 1995). Also, opioid medication for pain management is widespread, and opioid intake by pregnant mothers has also been linked to a higher incidence of infant mortality due mainly to SIDS (Burns et al., 2010). Thus, understanding the mechanisms by which chronic nicotine and opioid exposures lead to the blunting of chemosensitivity in AMCs is critical for the management of pathophysiological conditions associated with abnormal arousal responses in the neonate. In this regard, the observation that pre-exposure to the K<sub>ATP</sub> channel blocker glibenclamide reverses the loss of hypoxia tolerance seen in rat pups born to nicotine-treated dams

(Buttigieg et al., 2009) points to K<sub>ATP</sub> channels as targets for therapeutic intervention in cases where abuse of these drugs is implicated.

#### Acknowledgements

We acknowledge the contributions of several colleagues, especially Stephen Brown, Min Zhang, Cathy Vollmer, Nikol Piskuric, Simon Livermore and Alison Holloway.

#### Competing interests

The authors declare no competing financial interests.

#### Author contributions

S.S. and J.B. contributed to experimental design, performed several of the molecular and electrophysiological experiments described in this review, and helped in the preparation, organization and editing of this manuscript; C.A.N. contributed to the planning, organization and design of several experiments described in this review and wrote the first draft of this manuscript.

#### Funding

The authors acknowledge grant support from the Heart and Stroke Foundation of Ontario, the Natural Sciences and Engineering Research Council of Canada, and the Canadian Institutes of Health Research.

#### References

- Adams, M. B., Simonetta, G. and McMillen, I. C. (1996). The non-neurogenic catecholamine response of the fetal adrenal to hypoxia is dependent on activation of voltage sensitive Ca<sup>2+</sup> channels. *Brain Res. Dev. Brain Res.* **94**, 182-189.
- Bournaud, R., Hidalgo, J., Yu, H., Girard, E. and Shimahara, T. (2007). Catecholamine secretion from rat foetal adrenal chromaffin cells and hypoxia sensitivity. *Pflugers Arch.* **454**, 83-92.
- Brown, S. T. and Nurse, C. A. (2008). Induction of HIF-2 $\alpha$  is dependent on mitochondrial O<sub>2</sub> consumption in an O<sub>2</sub>-sensitive adrenomedullary chromaffin cell line. *Am. J. Physiol.* **294**, C1305-C1312.
- Brown, S. T., Kelly, K. F., Daniel, J. M. and Nurse, C. A. (2009). Hypoxia inducible factor (HIF)-2  $\alpha$  is required for the development of the catecholaminergic phenotype of sympathoadrenal cells. *J. Neurochem.* **110**, 622-630.
- Bunn, S. J., Marley, P. D. and Livett, B. G. (1988). The distribution of opioid binding subtypes in the bovine adrenal medulla. *Neuroscience* **27**, 1081-1094.
- Burns, L., Conroy, E. and Mattick, R. P. (2010). Infant mortality among women on a methadone program during pregnancy. *Drug Alcohol Rev.* **29**, 551-556.
- Buttigieg, J., Brown, S., Zhang, M., Lowe, M., Holloway, A. C. and Nurse, C. A. (2008a). Chronic nicotine *in utero* selectively suppresses hypoxic sensitivity in neonatal rat adrenal chromaffin cells. *FASEB J.* **22**, 1317-1326.
- Buttigieg, J., Brown, S. T., Lowe, M., Zhang, M. and Nurse, C. A. (2008b). Functional mitochondria are required for O<sub>2</sub> but not CO<sub>2</sub> sensing in immortalized adrenomedullary chromaffin cells. *Am. J. Physiol.* **294**, C945-C956.
- Buttigieg, J., Brown, S. T., Holloway, A. C. and Nurse, C. A. (2009). Chronic nicotine blunts hypoxic sensitivity in perinatal rat adrenal chromaffin cells via upregulation of KATP channels: Role of  $\alpha 7$  nicotinic AChR and hypoxia inducible factor-2 $\alpha$ . *J. Neurosci.* **29**, 7137-7147.
- Cheung, C. Y. (1990). Fetal adrenal medulla catecholamine response to hypoxia-direct and neural components. *Am. J. Physiol.* **258**, R1340-R1346.
- Cohen, G., Roux, J. C., Grailhe, R., Malcolm, G., Changeux, J. P. and Lagercrantz, H. (2005). Perinatal exposure to nicotine causes deficits associated with a loss of nicotinic receptor function. *Proc. Natl. Acad. Sci. USA* **102**, 3817-3821.
- Comline, R. S. and Silver, M. (1961). The release of adrenaline and noradrenaline from the adrenal glands of the foetal sheep. *J. Physiol.* **156**, 424-444.
- Comline, R. S. and Silver, M. (1966). The development of the adrenal medulla of the foetal and new-born calf. *J. Physiol.* **183**, 305-340.
- Daijo, H., Kai, S., Tanaka, T., Wakamatsu, T., Kishimoto, S., Suzuki, K., Harada, H., Takabuchi, S., Adachi, T., Fukuda, K. et al. (2011). Fentanyl activates hypoxia-inducible factor 1 in neuronal SH-SY5Y cells and mice under non-hypoxic conditions in a  $\mu$ -opioid receptor-dependent manner. *Eur. J. Pharmacol.* **667**, 144-152.
- Douglas, W. W. (1968). Stimulus-secretion coupling: the concept and clues from chromaffin and other cells. *Br. J. Pharmacol.* **34**, 451-474.
- Fearon, I. M., Thompson, R. J., Samjoo, I., Vollmer, C., Doering, L. C. and Nurse, C. A. (2002). O<sub>2</sub>-sensitive K<sup>+</sup> channels in immortalised rat chromaffin-cell-derived MAH cells. *J. Physiol.* **545**, 807-818.
- García-Fernández, M., Mejías, R. and López-Barneo, J. (2007). Developmental changes of chromaffin cell secretory response to hypoxia studied in thin adrenal slices. *Pflugers Arch.* **454**, 93-100.
- Giussani, D. A., Spencer, J. A., Moore, P. J., Bennet, L. and Hanson, M. A. (1993). Afferent and efferent components of the cardiovascular reflex responses to acute hypoxia in term fetal sheep. *J. Physiol.* **461**, 431-449.
- Holgert, H., Dagerlind, A. and Hökfelt, T. (1998). Immunohistochemical characterization of the peptidergic innervation of the rat adrenal gland. *Horm. Metab. Res.* **30**, 315-322.
- Huang, L. E., Gu, J., Schau, M. and Bunn, H. F. (1998). Regulation of hypoxia-inducible factor 1 $\alpha$  is mediated by an O<sub>2</sub>-dependent degradation domain via the ubiquitin-proteasome pathway. *Proc. Natl. Acad. Sci. USA* **95**, 7987-7992.



- Inoue, M., Fujishiro, N. and Imanaga, I. (1999). Na<sup>+</sup> pump inhibition and non-selective cation channel activation by cyanide and anoxia in guinea-pig chromaffin cells. *J. Physiol.* **519**, 385-396.
- Keating, D. J., Rychkov, G. Y. and Roberts, M. L. (2001). Oxygen sensitivity in the sheep adrenal medulla: role of SK channels. *Am. J. Physiol.* **281**, C1434-C1441.
- Keating, D. J., Rychkov, G. Y., Adams, M. B., Holgert, H., McMillen, I. C. and Roberts, M. L. (2004). Opioid receptor stimulation suppresses the adrenal medulla hypoxic response in sheep by actions on Ca(2+) and K(+) channels. *J. Physiol.* **555**, 489-502.
- Keating, D. J., Rychkov, G. Y., Giacomini, P. and Roberts, M. L. (2005). Oxygen-sensing pathway for SK channels in the ovine adrenal medulla. *Clin. Exp. Pharmacol. Physiol.* **32**, 882-887.
- Kimura, T., Katoh, M. and Satoh, S. (1988). Inhibition by opioid agonists and enhancement by antagonists of the release of catecholamines from the dog adrenal gland in response to splanchnic nerve stimulation: evidence for the functional role of opioid receptors. *J. Pharmacol. Exp. Ther.* **244**, 1098-1102.
- Kobayashi, S., Miyabayashi, T., Uchida, T. and Yanaiharu, N. (1985). Met-enkephalin-Arg6-Gly7-Leu8 in large-cored vesicles of splanchnic nerve terminals innervating guinea pig adrenal chromaffin cells. *Neurosci. Lett.* **53**, 247-252.
- Kölliker, A., Busk, G. and Huxley, T. (1854). *Manual of Human Histology*. London: Sydenham Society.
- Kuri, B. A., Chan, S. A. and Smith, C. B. (2009). PACAP regulates immediate catecholamine release from adrenal chromaffin cells in an activity-dependent manner through a protein kinase C-dependent pathway. *J. Neurochem.* **110**, 1214-1225.
- Lagercrantz, H. and Bistoletti, P. (1977). Catecholamine release in the newborn infant at birth. *Pediatr. Res.* **11**, 889-893.
- Lagercrantz, H. and Slotkin, T. A. (1986). The 'stress' of being born. *Sci. Am.* **254**, 100-107.
- Lee, J., Lim, W., Eun, S. Y., Kim, S. J. and Kim, J. (2000). Inhibition of apamin-sensitive K<sup>+</sup> current by hypoxia in adult rat adrenal chromaffin cells. *Pflugers Arch.* **439**, 700-704.
- Levitsky, K. L. and López-Barneo, J. (2009). Developmental change of T-type Ca<sup>2+</sup> channel expression and its role in rat chromaffin cell responsiveness to acute hypoxia. *J. Physiol.* **587**, 1917-1929.
- Livermore, S., Piskuric, N. A., Buttigieg, J., Zhang, M. and Nurse, C. A. (2011). Low glucose sensitivity and polymodal chemosensing in neonatal rat adrenomedullary chromaffin cells. *Am. J. Physiol.* **301**, C1104-C1115.
- Livermore, S., Piskuric, N. A., Salman, S. and Nurse, C. A. (2012). Developmental regulation of glucosensing in rat adrenomedullary chromaffin cells: potential role of the K(ATP) channel. *Adv. Exp. Med. Biol.* **758**, 191-198.
- Livett, B. G., Dean, D. M., Whelan, L. G., Udenfriend, S. and Rossier, J. (1981). Co-release of enkephalin and catecholamines from cultured adrenal chromaffin cells. *Nature* **289**, 317-319.
- Mitchell, E. A. and Milerad, J. (2006). Smoking and the sudden infant death syndrome. *Rev. Environ. Health* **21**, 81-103.
- Mochizuki-Oda, N., Takeuchi, Y., Matsumura, K., Oosawa, Y. and Watanabe, Y. (1997). Hypoxia-induced catecholamine release and intracellular Ca<sup>2+</sup> increase via suppression of K<sup>+</sup> channels in cultured rat adrenal chromaffin cells. *J. Neurochem.* **69**, 377-387.
- Mojet, M. H., Mills, E. and Duchon, M. R. (1997). Hypoxia-induced catecholamine secretion in isolated newborn rat adrenal chromaffin cells is mimicked by inhibition of mitochondrial respiration. *J. Physiol.* **504**, 175-189.
- Muñoz-Cabello, A. M., Toledo-Aral, J. J., López-Barneo, J. and Echevarría, M. (2005). Rat adrenal chromaffin cells are neonatal CO<sub>2</sub> sensors. *J. Neurosci.* **25**, 6631-6640.
- Nichols, C. G. (2006). KATP channels as molecular sensors of cellular metabolism. *Nature* **440**, 470-476.
- Nurse, C. A., Buttigieg, J., Brown, S. and Holloway, A. C. (2009). Regulation of oxygen sensitivity in adrenal chromaffin cells. *Ann. New York Acad. Sci.* **1177**, 132-139.
- Olver, R. E., Ramsden, C. A., Strang, L. B. and Walters, D. V. (1986). The role of amiloride-blockable sodium transport in adrenaline-induced lung liquid reabsorption in the fetal lamb. *J. Physiol.* **376**, 321-340.
- Papke, R. L., Kem, W. R., Soti, F., López-Hernández, G. Y. and Horenstein, N. A. (2009). Activation and desensitization of nicotinic alpha7-type acetylcholine receptors by benzylidene anabaseines and nicotine. *J. Pharmacol. Exp. Ther.* **329**, 791-807.
- Perry, S. F. and Capaldo, A. (2011). The autonomic nervous system and chromaffin tissue: neuroendocrine regulation of catecholamine secretion in non-mammalian vertebrates. *Auton. Neurosci.* **165**, 54-66.
- Prabhakar, N. R., Kumar, G. K. and Nanduri, J. (2009). Intermittent hypoxia-mediated plasticity of acute O<sub>2</sub> sensing requires altered red-ox regulation by HIF-1 and HIF-2. *Ann. N. Y. Acad. Sci.* **1177**, 162-168.
- Ream, M. A., Chandra, R., Peavey, M., Ray, A. M., Roffler-Tarlov, S., Kim, H. G., Wetsel, W. C., Rockman, H. A. and Chikaraishi, D. M. (2008). High oxygen prevents fetal lethality due to lack of catecholamines. *Am. J. Physiol.* **295**, R942-R953.
- Rico, A. J., Prieto-Lloret, J., Gonzalez, C. and Rigual, R. (2005). Hypoxia and acidosis increase the secretion of catecholamines in the neonatal rat adrenal medulla: an *in vitro* study. *Am. J. Physiol.* **289**, C1417-C1425.
- Ridley, D. L., Pakkanen, J. and Wonnacott, S. (2002). Effects of chronic drug treatments on increases in intracellular calcium mediated by nicotinic acetylcholine receptors in SH-SY5Y cells. *Br. J. Pharmacol.* **135**, 1051-1059.
- Sala, F., Nistri, A. and Criado, M. (2008). Nicotinic acetylcholine receptors of adrenal chromaffin cells. *Acta Physiol. (Oxf.)* **192**, 203-212.
- Salman, S., Brown, S. T. and Nurse, C. A. (2012). Chronic nicotine induces hypoxia inducible factor-2α in perinatal rat adrenal chromaffin cells: role in transcriptional upregulation of K<sub>ATP</sub> channel subunit Kir6.2. *Am. J. Physiol.* **302**, C1531-C1538.
- Salman, S., Buttigieg, J., Zhang, M. and Nurse, C. A. (2013). Chronic exposure of neonatal rat adrenomedullary chromaffin cells to opioids *in vitro* blunts both hypoxia and hypercapnia chemosensitivity. *J. Physiol.* **591**, 515-529.
- Sawnani, H., Jackson, T., Murphy, T., Beckerman, R. and Simakajornboon, N. (2004). The effect of maternal smoking on respiratory and arousal patterns in preterm infants during sleep. *Am. J. Respir. Crit. Care Med.* **169**, 733-738.
- Seidler, F. J. and Slotkin, T. A. (1985). Adrenomedullary function in the neonatal rat: responses to acute hypoxia. *J. Physiol.* **358**, 1-16.
- Semenza, G. L. (2004). Hydroxylation of HIF-1: oxygen sensing at the molecular level. *Physiology (Bethesda)* **19**, 176-182.
- Semenza, G. L. (2009). Regulation of oxygen homeostasis by hypoxia-inducible factor 1. *Physiology (Bethesda)* **24**, 97-106.
- Slotkin, T. A. and Seidler, F. J. (1988). Adrenomedullary catecholamine release in the fetus and newborn: secretory mechanisms and their role in stress and survival. *J. Dev. Physiol.* **10**, 1-16.
- Slotkin, T. A., Lappi, S. E., McCook, E. C., Lorber, B. A. and Seidler, F. J. (1995). Loss of neonatal hypoxia tolerance after prenatal nicotine exposure: implications for sudden infant death syndrome. *Brain Res. Bull.* **38**, 69-75.
- Souvannakitti, D., Nanduri, J., Yuan, G., Kumar, G. K., Fox, A. P. and Prabhakar, N. R. (2010). NADPH oxidase-dependent regulation of T-type Ca<sup>2+</sup> channels and ryanodine receptors mediate the augmented exocytosis of catecholamines from intermittent hypoxia-treated neonatal rat chromaffin cells. *J. Neurosci.* **30**, 10763-10772.
- Taylor, C. T. (2008). Mitochondria and cellular oxygen sensing in the HIF pathway. *Biochem. J.* **409**, 19-26.
- Thompson, R. J. and Nurse, C. A. (1998). Anoxia differentially modulates multiple K<sup>+</sup> currents and depolarizes neonatal rat adrenal chromaffin cells. *J. Physiol.* **512**, 421-434.
- Thompson, R. J., Jackson, A. and Nurse, C. A. (1997). Developmental loss of hypoxic chemosensitivity in rat adrenomedullary chromaffin cells. *J. Physiol.* **498**, 503-510.
- Thompson, R. J., Farragher, S. M., Cutz, E. and Nurse, C. A. (2002). Developmental regulation of O<sub>2</sub> sensing in neonatal adrenal chromaffin cells from wild-type and NADPH-oxidase-deficient mice. *Pflugers Arch.* **444**, 539-548.
- Thompson, R. J., Buttigieg, J., Zhang, M. and Nurse, C. A. (2007). A rotenone-sensitive site and H<sub>2</sub>O<sub>2</sub> are key components of hypoxia-sensing in neonatal rat adrenomedullary chromaffin cells. *Neuroscience* **145**, 130-141.
- Van Woudenberg, C. D., Wills, C. A. and Rubarth, L. B. (2012). Newborn transition to extrauterine life. *Neonatal Netw.* **31**, 317-322.
- Varas, R., Wyatt, C. N. and Buckler, K. J. (2007). Modulation of TASK-like background potassium channels in rat arterial chemoreceptor cells by intracellular ATP and other nucleotides. *J. Physiol.* **583**, 521-536.
- Wang, G. L., Jiang, B. H., Rue, E. A. and Semenza, G. L. (1995). Hypoxia-inducible factor 1 is a basic-helix-loop-helix-PAS heterodimer regulated by cellular O<sub>2</sub> tension. *Proc. Natl. Acad. Sci. USA* **92**, 5510-5514.
- Wittert, G., Hope, P. and Pyle, D. (1996). Tissue distribution of opioid receptor gene expression in the rat. *Biochem. Biophys. Res. Commun.* **218**, 877-881.
- Yuan, G., Nanduri, J., Bhasker, C. R., Semenza, G. L. and Prabhakar, N. R. (2005). Ca<sup>2+</sup>/calmodulin kinase-dependent activation of hypoxia inducible factor 1 transcriptional activity in cells subjected to intermittent hypoxia. *J. Biol. Chem.* **280**, 4321-4328.
- Yuan, G., Nanduri, J., Khan, S., Semenza, G. L. and Prabhakar, N. R. (2008). Induction of HIF-1α expression by intermittent hypoxia: involvement of NADPH oxidase, Ca<sup>2+</sup> signaling, prolyl hydroxylases, and mTOR. *J. Cell. Physiol.* **217**, 674-685.
